# Supplementary material for: A Novel PBPK Modeling Approach to Assess Cytochrome P450 Mediated Drug‐Drug Interaction Potential of the Cytotoxic Prodrug Evofosfamide
Source: PubMed Central journal article supplement — CPT Pharmacometrics Syst Pharmacol. 2018 Oct 31;7(12):829–37. doi: 10.1002/psp4.12360 (PMC6310869; doi:10.1002/psp4.12360), 2018-10-31
Supplement: PSP4-7-829-s002.pdf [file PSP4-7-829-s002.pdf]

Supplementary Information S2: Evofosfamide compound file and trial simulation settings for the base model of simulations on interaction potential via CYP3A induction

Evofosfamide compound file for modeling induction of CYP3A. For file development and validation, see text and supplementary material S1

| Parameter                   | Value               |
|-----------------------------|---------------------|
| Setup: Is small molecule    | Yes                 |
| mol. wt. (g/mol)            | 449                 |
| log P                       | 0.92                |
| Compound type               | Neutral             |
| B:P ratio                   | 1.61                |
| fu,p                        | 0.455               |
| Main plasma binding protein | Human serum albumin |
| fu <sub>gut</sub>           | 1                   |
| Distribution Model          | Minimal PBPK Model  |
| V <sub>ss</sub> (L/kg)      | 0.43                |
| CV V <sub>ss</sub> (%)      | 79.0                |
| CL <sub>iv</sub> (L/h)      | 63.6                |
| CV CL <sub>iv</sub> (%)     | 54.0                |
| CL <sub>R</sub> (L/h)       | 0                   |
| Enzyme                      | CYP3A4              |
| Ind <sub>max</sub>          | 8                   |
| IndC <sub>50</sub> (μM)     | 2.5                 |
| Enzyme                      | CYP3A5              |
| Ind <sub>max</sub>          | 8                   |
| IndC <sub>50</sub> (μM)     | 2.5                 |

B:P ratio, blood to plasma concentration ratio; CL<sub>iv</sub>, clearance after intravenous administration; CL<sub>R</sub>, renal clearance; CV, coefficient of variation; CYP, cytochrome P450 enzyme; fu<sub>gut</sub>, fraction unbound in enterocytes; fu,p, fraction unbound in plasma; IndC<sub>50</sub>, concentration that gives half maximal fold induction; Ind<sub>max</sub>, maximal fold induction; logP, octanol-water partition coefficient; mol. wt., molecular weight; V<sub>ss</sub>, volume of distribution at steady state

The midazolam PK was described using the “Sim-Midazolam” compound file provided within the Simcyp simulator software. The “Sim-Midazolam” file was used without any further modification.

Trial simulation settings for induction base model

| <b>Parameter</b>            | <b>Value</b>                                             |
|-----------------------------|----------------------------------------------------------|
| Midazolam                   | 5 mg SD orally, 3 h after start of evofosfamide infusion |
| Evofosfamide                | 340 mg/m <sup>2</sup> SD, as 30 min infusion             |
| Number of subjects x trials | 10 x 10                                                  |
| Population                  | North European Caucasian                                 |
| Age range (years)           | 18 - 80                                                  |
| Proportion of females       | 0.5                                                      |
| Prandial state              | Fasted                                                   |
| Duration (h)                | 27                                                       |
| PKPD Profiles simulated     | Yes                                                      |

PKPD Profiles, time courses of PK and/or PD endpoints; SD, single dose

The models for multiple dosing, sensitivity analyses, etc. were derived from the base model by adjusting the respective parameters as described in the text.
